# Supplementary material for: Reframing gullies as recharge zones in dryland landscapes of the Loess Plateau, China
Source: Copernicus journal article supplement (doi:10.5194/egusphere-2025-4065), 2025-09-24
Supplement: Supplementary file [file egusphere-2025-4065-AC3-supplement.pdf]

1 **# RC2**

2  
3 We sincerely thank you for taking the time to review our manuscript and for providing valuable,  
4 professional, and rigorous feedback. Your constructive comments have been crucial in improving  
5 the quality of our manuscript. **Based on the comments from reviewers #RC1 and #CC1, we have**  
6 **addressed all your comments and, after careful reflection and multiple discussions, made**  
7 **comprehensive revisions, along with a detailed response to the revisions.** In response to your  
8 feedback, your comments are presented in red font, our responses in black, and the revisions to the  
9 manuscript in blue.

10  
11 This manuscript addresses groundwater recharge processes in a gully system and aims to quantify  
12 recharge rates and pathways using hydrometric, isotopic, and geochemical approaches. While the  
13 topic is potentially interesting and relevant to HESS, the manuscript in its current form is poorly  
14 written, excessively long, and lacks a clear narrative structure. Moreover, the presentation of the  
15 results makes it difficult to assess whether the data adequately support the authors' conclusions.  
16 Interpretations are frequently motivated by background knowledge or earlier studies, yet the  
17 manuscript does not clearly distinguish between new insights derived from this work and those that  
18 primarily serve as contextual or corroborative information. This lack of separation between novelty  
19 and background substantially weakens the scientific message. I think substantial revision is required  
20 before the scientific contribution can be properly evaluated.

21 **Response:** We agree with your comments regarding the manuscript's structure and expression and  
22 have systematically revised it based on your general and specific comments to enhance its  
23 readability and academic rigor. The manuscript has been reorganized, redundant sections  
24 streamlined, and the logical flow between the Introduction, Methods, Results, and Discussion  
25 strengthened. The data analysis and interpretation in the Results section have been clarified to more  
26 effectively demonstrate the evidence supporting the conclusions. Additionally, the background  
27 information has been refined, with a clearer distinction made between existing research and new  
28 insights to highlight the uniqueness and contribution of our work. Below are the specific changes  
29 we have made, along with our point-by-point responses to your comments.

**General comments:**

1. A major issue is that Sections 1-3 contain extensive redundant descriptions, particularly regarding landscape characteristics, hill–gully contrasts, and background motivation. These sections mix site description, conceptual motivation, and literature background in a way that dilutes the main research questions and obscures the novelty of the study. As written, it is often unclear what information is background context, what is specific to the study site, and what directly supports the research objectives.

If I understand correctly, Sections 2-3 are primarily intended to function as a Materials / Study Site section, describing landscape structure and hydrological setting. However, the current version repeatedly interweaves general motivation (e.g., importance of gullies vs. hill) with sitespecific descriptions. This mixing weakens the paper’s focus and makes the manuscript unnecessarily long.

I would suggest the following structural changes:

- Condense Sections 1–3 substantially, removing repetitive explanations of hill vs. gully processes.
- Move most general motivation and background discussion to the Introduction.
- End the Introduction with a clear and concise paragraph that explicitly states why this study site was chosen, what relevant previous work has been conducted here, why this site is particularly suitable for addressing the stated research questions, and what the specific research questions or hypotheses are.

Response: Based on your valuable comments regarding the manuscript's structure, we have systematically revised and streamlined Sections 1 to 3 as follows:

- The original Section 2 has been removed, with its key points integrated into Sections 1 and 3.
- Redundant descriptions have been significantly condensed, especially in the comparison of hilly and gully processes.
- We have avoided the overlap between general research motivation and specific regional information, improving the coherence and clarity of the manuscript.

Additionally, we have explicitly added the scientific rationale for selecting the study area at the end of the Introduction, further clarifying the research questions and goals. These revisions aim to

enhance the manuscript's logical focus and narrative clarity, while highlighting the novelty of the study. The specific revisions are as follows:

## **“1. Introduction**

Groundwater recharge is a critical yet poorly understood component of hydrological cycles in dryland catchments (Li et al., 2024a). It is shaped by the precipitation regime, surface landcover heterogeneity, integrity of the subsurface regolith, characteristics of the underlying bedrock, and human interventions (Vries and Simmers, 2002; Owuor et al., 2016; Salek et al., 2018; Xu and Beekman, 2019; Zhang et al., 2020; Li et al., 2024b; Medici et al., 2024). While favorable subsurface flow pathways can locally enhance recharge, dryland regions are highly sensitive to even slight changes in precipitation, soil moisture, or runoff generation. This heightened sensitivity reflects their position along climatic ecotones and the influence of complex land–atmosphere–biosphere feedbacks (Kuang et al., 2019; Al-Oqaili et al., 2020; He et al., 2020; Jin et al., 2019; Jia et al., 2024). Small changes in these processes can cascade across catchments at various scales, amplifying existing vulnerabilities to ecological and social systems (Nicholson, 2011; Huang et al., 2017; Berg et al., 2016). In these fragile landscapes, understanding groundwater replenishment processes is crucial for sustaining ecosystems, securing water, and guiding restoration and management (Gleeson et al., 2016; Jasechko and Perrone, 2021; Scanlon et al., 2006).

Despite a growing body of research on groundwater recharge in (semi-) arid regions, significant knowledge gaps remain in landscapes with pronounced spatial heterogeneity, such as slopes, hilltops, and gully systems, where infiltration pathways and recharge processes can diverge sharply over short distances (Tooth, 2012; Manna et al., 2018; Letz et al., 2021). Gully systems, often seen as signs of land degradation, may beneficially act as recharge zones, capturing and infiltrating surface runoff during episodic rainfall (Tan et al., 2017; Li et al., 2024a; Xue et al., 2025). This same topographic focusing enables the rapid downslope transport of contaminants, including agricultural nutrients, sediments, and associated pollutants (Lian et al., 2025; Qu et al., 2025). However, the role of gullies in promoting vertical infiltration into groundwater is highly dependent on local subsurface connectivity and permeability conditions. Moreover, their broader hydrological functions remain poorly quantified, especially under the influence of widespread human interventions such as check dams and artificial ponds. While these structures are typically designed to arrest land surface degradation, they can substantially alter surface–subsurface connectivity and reshape recharge

dynamics in uncertain ways (Lamontagne et al., 2021; Huang et al., 2019; Wang et al., 2023).

Worldwide, loess covers approximately 6% of the land surface area, forming discontinuous east–west belts in the mid-latitude forest-steppe, steppe, and desert-steppe zones of both hemispheres (Liu, 1985; Pécsi, 1990; Li et al., 2020). Among these, the Chinese Loess Plateau, the focus of our study accounts for approximately 7.4% of the global loess area (635,280 km<sup>2</sup>; Li et al., 2020). It serves as a globally important natural laboratory for studying soil erosion and groundwater recharge processes, due to its exceptionally thick loess deposits (Li et al., 2021), highly erodible soils, intense summer rainstorms, and long history of agricultural activity, which collectively make it one of the most severely eroded regions worldwide (Shi and Shao, 2000; Fu et al., 2011). Its distinctive stratigraphic structure, characterized by thick, low-permeability loess layers, fundamentally governs groundwater behavior (Qiao et al., 2017). Meanwhile, extensive human interventions aimed at erosion control, including large-scale afforestation and gully engineering projects, have profoundly altered regional hydrological processes and the spatial redistribution of water (Wang et al., 2020; Zhao et al., 2024).

The setting for our investigation is a semi-arid landscape that has been shaped by severe soil erosion, extensively modified by engineered landforms; and it is now characterized by chronic water scarcity (Fu et al., 1999; Liu et al., 2017; Liu and Li, 2017; Li et al., 2021; Huang et al., 2024). Water scarcity manifests as declining groundwater levels, reduced streamflow, dried-up wells and springs, and limited irrigation capacity (Yu et al., 2025). In such vulnerable environments, understanding the sources and sustainability of groundwater recharge is critical for long-term water resource management (Ajjur and Baalousha, 2021; Meles et al., 2024). Groundwater, for example, is a lifeline for rural communities in the hilly–gully region, yet scientific attention has largely bypassed the gullies themselves. Most previous studies have focused on recharge processes in tablelands and loess-covered hills, highlighting slow “piston flow” as the dominant mechanism (Huang et al., 2011, 2013; Li et al., 2017; Lu, 2020; Wang et al., 2024). However, the deep-profile recharge mechanisms observed in these areas may not apply to the gully-dominated landscapes of the Loess Plateau (Wang et al., 2024; Qiao et al., 2017; Zhu et al., 2018). Moreover, the hydrological functions of widely distributed gully systems, especially under the influence of engineering structures such as check dams, remain insufficiently quantified, and their underlying processes have long remained in the research shadow (Liu et al., 2011).

Therefore, this study selects the Nianzhuang Catchment, a typical gully area on the Loess Plateau impacted by check dams, to establish a multi-method framework for assessing groundwater recharge by integrating stable isotope analysis ( $\delta^2\text{H}$  and  $\delta^{18}\text{O}$ ), chloride concentrations, water table fluctuations, and hydro-statistical modeling. Specifically, our goals are to: (1) characterize the isotopic and hydrochemical signatures of precipitation, surface water (ponds), shallow pore water, and deeper fissure water; (2) identify and trace hydraulic connections and flow paths of different water bodies; and (3) quantitatively estimate pore-water recharge rates. This integrated approach aims to advance understanding of groundwater dynamics in complex dryland terrains, reframes engineered gully systems as critical recharge zones in engineered dryland landscapes, providing actionable insights for sustainable groundwater management and ecological restoration in the Loess Plateau and similar semi-arid regions worldwide.

## **2. Sampling site**

The Nianzhuang Catchment is located northwest of Yan'an City in Shaanxi Province, China (approximately  $36^{\circ}42'\text{N}$ ,  $109^{\circ}31'\text{E}$ ). As a tributary of the Yan River, which ultimately flows into the Yellow River, the catchment spans  $53.94\text{ km}^2$  and includes the well-studied Yangjuangou sub-catchment ( $3.11\text{ km}^2$ ;  $\sim 36^{\circ}35'\text{N}$ ,  $\sim 109^{\circ}32'\text{E}$ ), previously investigated in numerous hydrological and ecological studies (Fu et al., 1999; Fu et al., 2011; Fu et al., 2017; Liu and Li, 2017). Elevation ranges from 896 to 1,269 m, with terrain gradually sloping from northwest to southeast (Fig. 1). The region experiences a semi-arid continental monsoon climate, with a mean annual precipitation of approximately  $550 \pm 100\text{ mm}$ , concentrated between July and September (Liu et al., 2017).

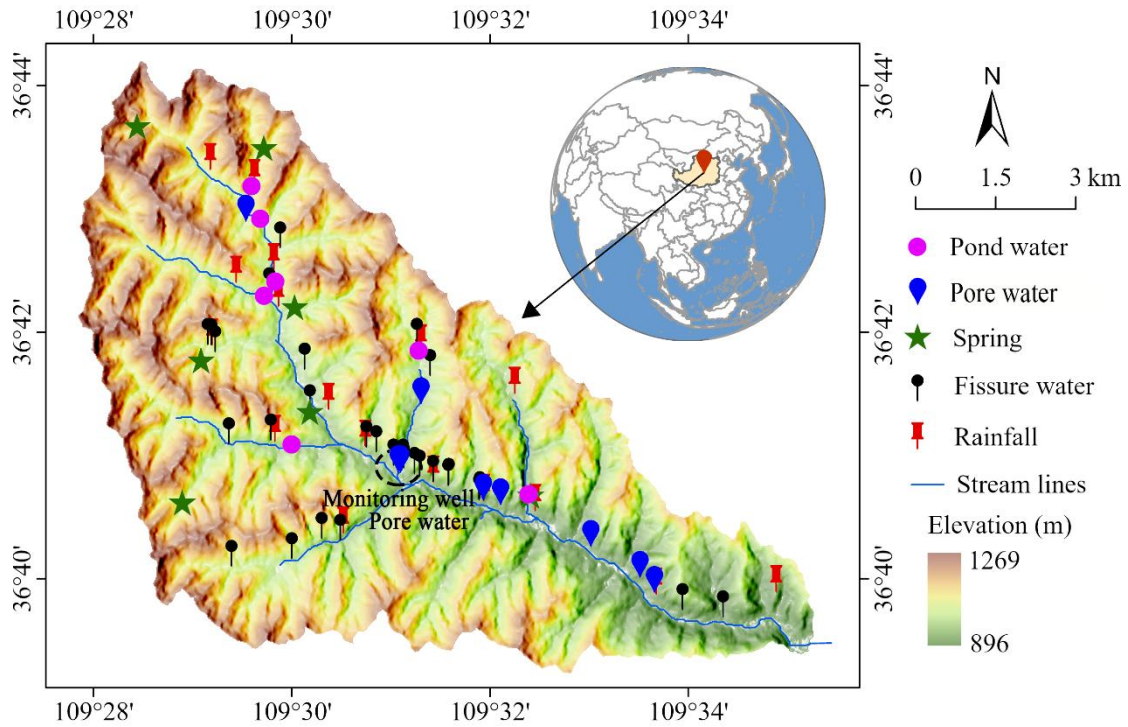

Fig. 1. The geographical location and sampling sites for rainfall, pond water, pore water, spring water, and fissure water in the Nianzhuang Catchment. The Nianzhuang Catchment is located in the hilly and gully region of the central Loess Plateau, with elevations ranging from 896 to 1269 m. The average depth of pore water wells is  $8.0 \pm 1.5$  m (range: 4–10 m), while that of fissure water wells is  $57.6 \pm 29.2$  m (range: 25–170 m). These sampling sites represent locations where both rainy and dry season samples were collected, and are all situated within the gully areas of the catchment.

The catchment features highly dissected loess terrain, with characteristic soils and landforms such as Loess Liang (ridges), Loess Mao (mounds), and steep loess slopes (Cai et al., 2019). Gullies, often “V”- or “U”-shaped, dominate the lower-lying regions and serve as important recharge zones. These landforms, together with ancient landslides, minor collapses, and sinkholes, highlight the geomorphic instability of the Loess Plateau landscape (Li et al., 2021). From May to October 2023, total rainfall reached 420 mm, with 115 mm in September alone. Despite this substantial precipitation, field observations revealed shallow infiltration depths on loess slopes even after heavy rainfall events of up to 41 mm. Infiltration was limited to 20–30 cm at hilltops and about 80 cm at mid-slope, with no distinct preferential flow and largely unsaturated soil profiles (Fig. 2). These observations suggest that groundwater recharge occurs mainly through surface or near-surface runoff converging into engineered gully systems, underscoring their critical role as focused zones



of groundwater recharge and key sites for studying these processes.

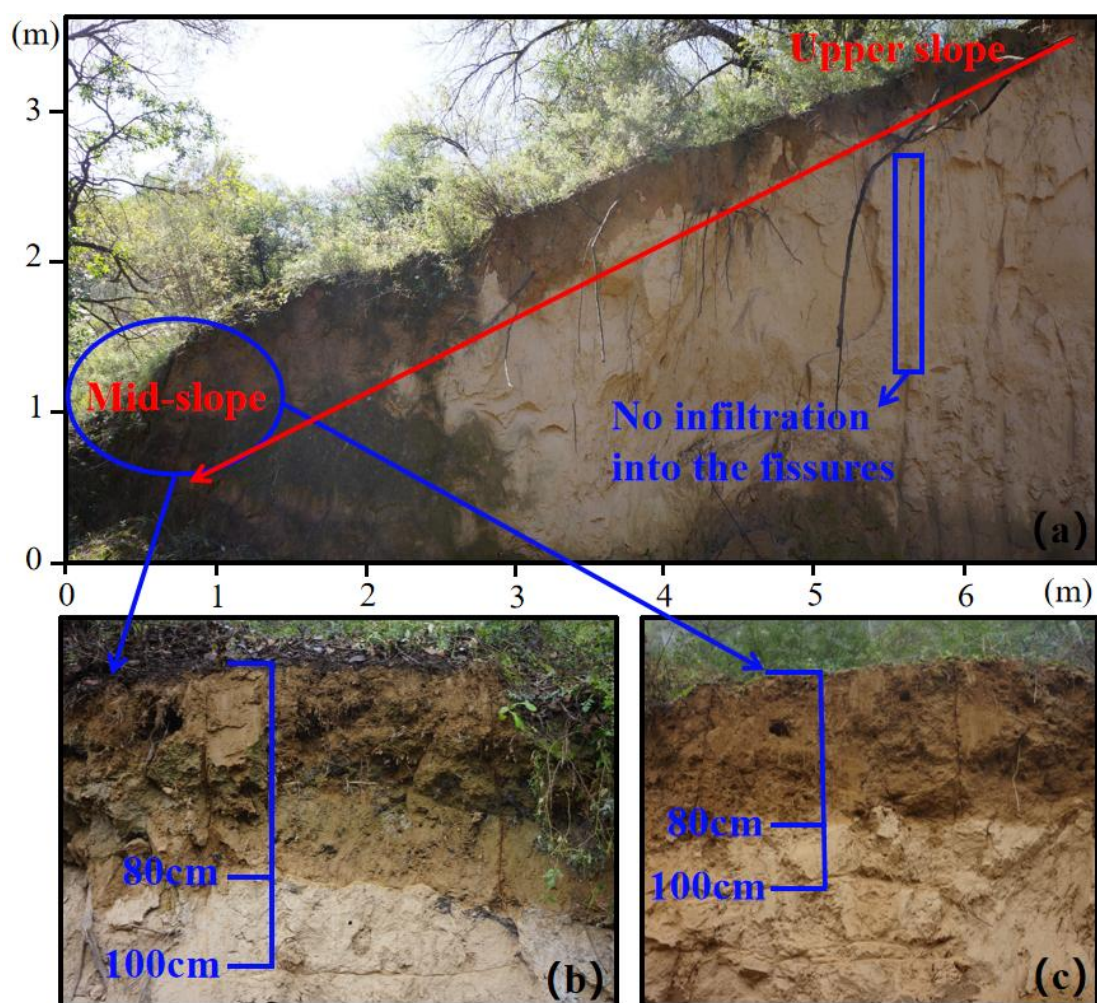

Fig. 2. The topographic profile of the Nianzhuang Catchment in the hilly region of the Loess Plateau. Full profile from the top to mid-slope (a); two repeated mid-slope profiles (b, c). The photo was taken after a 41 mm rainfall event over four days. Subsequent measurements showed that infiltration depths reached only 20–30 cm at the top of the slope, compared to approximately 80 cm at the mid-slope positions.

The stratigraphy of the catchment reflects the typical layered structure of the Loess Plateau, which plays a key role in controlling groundwater recharge. In upland hilly areas, thick loess deposits overlie bedrock, with the Upper Pleistocene Malan Loess, a light grayish-yellow, loosely textured, and silt-rich unit (>60%), characterized by well-developed vertical joints and abundant hematite and goethite. Beneath it lies the Middle Pleistocene Lishi Loess, a grayish-yellow to light brown unit with prominent jointing and higher iron mineral content. Below the loess, the Neogene

Red Clay appears as a distinctly reddish, calcareous nodule-bearing aquitard due to its low permeability. The entire sequence rests on Jurassic sandstone–conglomerate bedrock, composed mainly of quartz-rich fluvial–lacustrine deposits.

Loess thickness in the Liang and Mao regions often exceeds 150 meters, resulting in deep water tables and limited groundwater accessibility. In contrast, gully zones exhibit distinctly different hydrogeological characteristics. Here, thinner loess layers overlie Neogene and Jurassic formations, sometimes interbedded with coal seams up to 5 meters thick (Fig. 3a–c). The significant reduction in loess thickness, combined with the relatively high permeability of Neogene coarse sandstone and conglomerate (0.07–0.31 m/d), creates favorable conditions for infiltration and focused recharge. These dynamics are especially evident at gully heads, where surface runoff from adjacent uplands converges and infiltrates, forming efficient recharge zones. As a result, gully areas tend to have shallower water tables and more rapid water renewal, making them more suitable for domestic groundwater use. Springs frequently emerge at gully bottoms where lateral flow is facilitated at the loess–bedrock interface. Streams in this dry environment are largely intermittent.

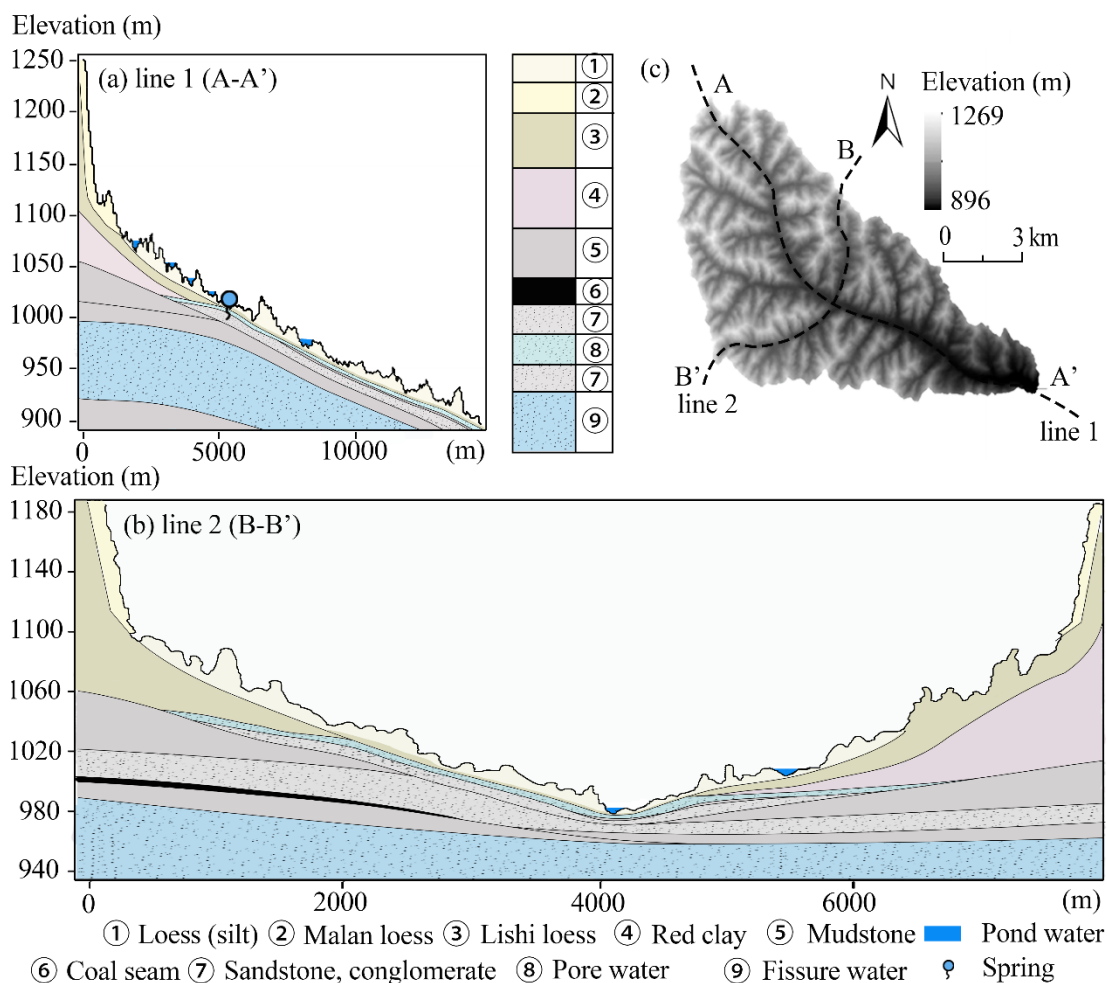



Fig. 3. Hydrogeologic cross-section of the study area. Cross-section along Line 1 (Northwest-Southeast) (a); cross-section along Line 2 (Southwest-Northeast) (b); location map of Line 1 and Line 2 within the study area (c). The Malan Loess (11.7–12.6 Ka BP) and Lishi Loess (12.6–78.1 Ka BP) are two major Quaternary loess stratigraphic units in China. Based on hydrogeological research, the stratigraphy of the hilly region features a multi-layer structure from top to bottom: Upper Pleistocene Malan Loess, Middle Pleistocene Lishi Loess, Neogene Red Clay and Mudstone (2.58–23.03 Ma BP), and Jurassic Sandstone and Conglomerate (145–201.3 Ma BP). In the gully region, the stratigraphy includes Holocene loess (silt, 11.7 ka BP–present), Middle Pleistocene Lishi Loess, Neogene sandstone and mudstone, and Jurassic sandstone and conglomerate, with some areas containing coal seams up to 5 meters thick.

Groundwater in the catchment can be broadly categorized into three types: pore water, spring water, and fissure water. Pore water is stored in permeable sandstone and conglomerate aquifers beneath loess and above mudstone or red clay. These aquifers are approximately 2–3 m thick, exhibit a sheet-like distribution, and have low water yield. Conceptually, “pore water” here refers to groundwater in a saturated aquifer, not to soil moisture. Fissure water occurs in fractured bedrock aquifers, which are spatially discontinuous due to irregular fracture development. The main water-bearing zones include cavities and jointed fissure networks, with an average aquifer thickness of about 6 m and moderate water yield. Hydraulic conductivity in these sandstone and conglomerate aquifers ranges from 0 to 0.47 m/d (Cai et al., 2019). Spring water emerges primarily at gully bases, especially in upper catchments, and originates from both pore and fissure sources, possibly supplemented by surface or pond water. Springs fed by pore water typically have low discharge rates (0–0.1 L/s) and low water yield, while those fed by fissure water exhibit moderate discharge rates (0.5–1.0 L/s) and moderate water yield.

Over recent decades, landscape rehabilitation through the Grain for Green Project and land reshaping under the Gully Land Consolidation Project have significantly altered the hydrological regime (Fu et al., 1999; Liu et al., 2017). Historically, surface runoff in the degraded catchment was flashy and episodic due to sparse vegetation. However, ecological restoration and small-scale engineering interventions, such as check dams, terraces, roads, and ponds, have moderated surface hydrology. Surface runoff, generated primarily during storm events, now contributes alongside

220 delayed baseflow from groundwater recharge and interflow. The latter is often limited by the thick  
221 unsaturated zone in upland loess areas but may be enhanced in gully regions, where stratigraphy  
222 and land use favor infiltration (Wang et al., 2024; Gates et al., 2011). Gully areas also contain  
223 numerous check dams and ponds, with most water sourced from Hortonian overland flow of slope  
224 lands and direct rainfall. These small water bodies, often constructed for erosion control and water  
225 retention, influence local hydrological dynamics and may play a role in enhancing infiltration and  
226 recharge.”

227  
228 2. Interpretation and use of chloride concentrations. The role of chloride as supporting evidence for  
229 recharge pathways is repeatedly mentioned but remains vague and weakly justified. And I only  
230 found one figure in SI about chloride information, which is also not that informative as the author  
231 stated.

232 **Response:** To clarify, stable isotopes ( $\delta^2\text{H}$  and  $\delta^{18}\text{O}$ ) and chloride ions ( $\text{Cl}^-$ ) are distinct tracers, each  
233 influenced by hydrological processes through different mechanisms. Stable isotopes are highly  
234 sensitive to evaporative fractionation, making them direct indicators for identifying water sources  
235 and evaporation history. In contrast, chloride ions generally exhibit conservative behavior during  
236 hydrological transport, with concentration changes primarily driven by physical mixing and  
237 evaporative concentration, without involvement in isotopic fractionation. This difference allows  
238 their combined use to provide more robust and comprehensive information for tracing water sources.  
239 In this study, chloride concentrations primarily support the isotope analysis, helping to validate  
240 water source mixing and groundwater recharge processes, and confirming that pore water is  
241 influenced by both precipitation and the mixing of precipitation with pond water.

242 Since chloride ions are not affected by fractionation during hydrological processes, their  
243 concentration changes are primarily driven by water source mixing and evaporation (water loss).  
244 Therefore, chloride plays a key role in resolving the “isotopic ambiguity” impacted by evaporation  
245 fractionation (open water). Our observational data show that the chloride concentration in pore  
246 water falls between that of low-concentration precipitation and high-concentration pond water.  
247 Additionally, the correlation between chloride concentration and  $\delta^{18}\text{O}$  follows a conservative mixing  
248 model between precipitation and pond water. This evidence suggests that pore water chemistry  
249 changes are influenced by the mixing of chloride-rich pond water, reinforcing the mechanism of

pore water recharge through the mixing of precipitation and surface water in the valley system.

Following your comments, we have moved the chloride concentration plot to the main text and added the correlation between chloride concentration and  $\delta^{18}\text{O}$ . This presents the key argument more clearly and comprehensively, thereby further enhancing the rigor and persuasiveness of our conclusions.

For example,

- Line 536: The statement that “multiple lines of observational evidence, including isotopic composition, chloride concentrations, and water age (ITTP)” support the identified pathways is too general. The manuscript does not clearly explain how chloride independently supports these conclusions.

**Response:** In the original manuscript, line 536 referred to observational evidence such as chloride concentrations and isotopic composition, aiming to provide multi-faceted support for the flow pathways identified by the SEM. To avoid presenting an oversimplified argument and to ensure that the discussion remains focused on the core results and interpretation of the SEM, we have removed this supplementary explanation in the revised manuscript, maintaining both coherence and academic rigor.

- Lines 547–552: The argument that similarities in chloride concentrations between pond water and pore water indicate mixed recharge is not logically developed. Chloride patterns alone do not necessarily imply source mixing without additional constraints (e.g., conservative behavior, spatial gradients, mass balance, or exclusion of evaporative concentration effects). The logic linking chloride distributions to the stated conclusions should be clarified and strengthened, or the claims should be toned down.

**Response:** Based on your comments, to strengthen the logical rigor of the conclusion regarding the similarity in chloride concentrations between pond water and pore water, we first confirmed the differences in chloride concentrations among various water sources. We then introduced the spatial relationship between  $\delta^{18}\text{O}$  and chloride concentrations to further compare concentration variations across different water bodies at distinct locations. The results indicate a correlation between the distribution patterns of chloride concentrations and  $\delta^{18}\text{O}$ , providing additional support for the

hypothesis of potential mixed recharge between pond water and pore water. The specific additions to the manuscript are detailed as follows:

“Complementing the isotope data,  $\text{Cl}^-$  levels in pore water consistently fall between those of precipitation and pond water across both seasons (Fig. 7a), and the correlation pattern between chloride concentration and  $\delta^{18}\text{O}$  supports a mixed recharge origin for pore water (Fig. 7b). This trend aligns with the isotopic evidence from the rainy season and supports the interpretation that pond water contributes to pore water recharge via vertical percolation through the vadose zone, particularly during high-rainfall periods when infiltration capacity is exceeded.

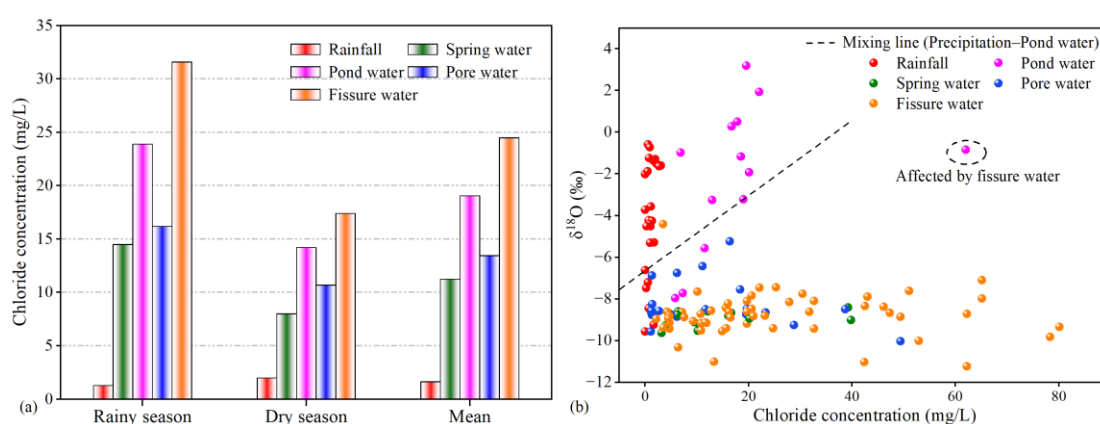

Fig. 7. Chloride concentration of various water sources in the rainy and dry seasons (a), and the spatial relationship between chloride concentration and  $\delta^{18}\text{O}$  for different water sources (b).”

• Line 856-858: The conclusion states "While isotopic evidence for recharge from pond water is obscured by evaporative fractionation, chloride concentrations provide a clear signal of subsurface connectivity." It is not supported by any direct or quantitative results presented in the manuscript. I do not find clear evidence demonstrating such connectivity based on chloride data alone. Moreover, if chloride concentrations are intended to provide critical supporting information for the main conclusions, the relevant figure should be moved from the Supplementary Information to the main text, accompanied by a clearer and more rigorous explanation of how chloride constrains recharge pathways.

**Response:** Following your comment, we have provided further evidence of connectivity between pond water and pore water in the main text through both textual explanation and supplementary figures. Additionally, to ensure the conclusions are detailed and well-supported, we have revised the

relevant section, with the specific revision as follows:

“Through integrated analysis of stable isotopes, chloride concentrations, water-table fluctuations, and inverse transit time proxies, this study provides multiple, convergent lines of evidence that engineered gully reaches on the Loess Plateau function as hydrologically significant recharge zones, rather than solely as products of accelerated erosion and degradation. Precipitation-driven runoff supports substantial recharge to shallow pore aquifers, with site-scale recharge magnitudes equivalent to approximately 43% of mean annual precipitation at the monitored gully reach. Although evaporative fractionation limits the ability of stable isotopes alone to resolve direct recharge from ponded surface water, chloride concentrations provide independent evidence consistent with mixing between pond water and pore water, complementing the isotopic patterns. Together, these indicators indicate likely hydraulic connectivity, while not constituting a mass-balanced quantification of recharge sources. Recharge within shallow gully-zone aquifers is spatially concentrated and temporally selective, governed by topographic convergence, loess stratigraphy, and ecological engineering structures, particularly check dams and ponds, which increase surface-water residence time and promote focused infiltration.”

3. Role of surface water. The Discussion contains extensive statements regarding the large contribution of surface water to gully recharge. However, much of this discussion appears to rely on previous studies rather than direct analyses presented in this manuscript. The authors should clearly distinguish between conclusions derived from their own results, and contextual information drawn from earlier work.

**Response:** Thank you for this thoughtful comment regarding the role of surface water. One of the primary objectives of this study is to evaluate the contribution of surface water—represented mainly by pond water—to groundwater recharge in gully systems. Using stable isotope data ( $\delta^2\text{H}$  and  $\delta^{18}\text{O}$ ) together with chloride concentrations, we provide direct evidence in the Results section for hydraulic linkage between pond water and pore water. This linkage is further quantified using the structural equation model (SEM), which explicitly evaluates recharge pathways and their relative strengths. The SEM results indicate that the direct effect of pond water on pore water is significantly stronger than that of precipitation, suggesting that pond water acts as an important intermediary in the recharge process within the study catchment.

At the same time, we recognize that parts of the Discussion refer to broader hydrological processes that have been documented in previous studies. Following your suggestion, we have carefully revised the Results and Discussion sections to clearly distinguish between conclusions that are directly supported by our data and analyses, and contextual interpretations that are informed by earlier work. Conclusions derived from this study are now explicitly attributed to our observations and modeling results, whereas references to more general gully hydrological functions or the impacts of engineering measures are clearly framed as supporting background. These revisions help clarify the evidentiary basis of our conclusions and strengthen the overall rigor of the manuscript. The main revisions are as follows:

“In recent years, discussions of groundwater recharge sources on the Loess Plateau have largely focused on tableland and hilly areas characterized by thick loess deposits, whereas gully regions have received comparatively limited attention (Li et al., 2017; Xiang, 2020; Lu, 2020). For instance, Liu et al. (2011) demonstrated that groundwater near valley bottoms in hilly loess areas can be replenished by a combination of precipitation, runoff, and surface water. Our results are broadly consistent with these earlier findings, but extend them by providing multiple lines of site-specific evidence. Based on stable isotope signatures and chloride concentrations, we independently identify precipitation and surface water as the primary sources of groundwater recharge in gully systems. Furthermore, by applying a structural equation model (SEM), we quantitatively evaluate the relative importance of different recharge pathways, demonstrating that surface water (particularly pond water) plays a key mediating role in transferring precipitation inputs to subsurface pore water. Building on these results, we classify groundwater in the study area into three functional types, spring water, pore water, and fissure water, and propose a progressive, multi-stage recharge framework: (1) direct recharge of pond water by precipitation and indirect recharge of pore water by precipitation; (2) focused recharge from pond water to pore water; and (3) downward percolation from pore water to fissure water. This framework highlights the complexity of groundwater flow and recharge processes in gully-dominated landscapes and underscores the significant influence of human interventions, such as ponds and check dams, on modifying hydrological connectivity and recharge dynamics.”

“This conceptual reframing is grounded in the stark hydrological contrasts between hilly uplands and gully systems and directly addresses a critical knowledge gap in understanding the hydrological



functioning of managed gully environments. In the hilly uplands, previous studies have shown that thick loess deposits, often exceeding 90 m (including low-permeability aquifers), combined with steep slopes ( $>15^\circ$ ) severely restrict vertical infiltration (Zhu et al., 2018; Huang et al., 2019; Huang et al., 2024). Compounded by short-duration, high-intensity rainfall events that provide insufficient moisture for deep profile wetting, this results in the rapid conversion of rainfall into surface runoff (Li et al., 2021). This study further clarifies that the runoff is systematically funneled downslope into gully systems as a consequence of ecological engineering interventions, such as check dams and retention ponds that intercept and concentrate overland flow. Most infiltration occurs after surface water accumulates in engineered gullies, particularly within perched water bodies like ponds, which subsequently serve as localized recharge foci, a conclusion supported by the isotopic and hydrochemical evidence presented in this study.”

4. Hill versus gully. The results presented in this study are derived exclusively from the gully system, and the manuscript does not include a direct comparison of recharge behavior between hill and gully settings at the same site and during the same period. As such, the authors should be very cautious in how they frame both the Introduction and the Conclusions, particularly where broader contrasts between hill and gully recharge processes are implied. Given the absence of contemporaneous hillslope observations, statements suggesting relative differences in recharge magnitude or pathways between hill and gullies should be clearly identified as inferences based on previous studies, rather than findings derived from the present work. This distinction is especially important in the conceptual framework and schematic figures, where hill processes appear alongside gully processes without sufficiently clear attribution. One example is the conceptual figure (Fig. 10). I recommend that the authors:

- Explicitly state which components or pathways are supported by results from this study and which are drawn from previous literature;
  - Redraw the figure to include quantitative or semi-quantitative information (e.g., relative magnitudes, ranges, or percentages of pathways) where supported by data.
- In its current form, the conceptual figure does not clearly highlight new insights generated by this study, and instead risks reinforcing a narrative largely based on prior work.

**Response:** Thank you very much for your constructive comment. In response to your General

comment #1, we have thoroughly revised the Introduction section, emphasizing the novelty and scientific significance of groundwater recharge processes in gully areas under engineering interventions. This study specifically focuses on hydrological processes within the valley zone and does not directly address hillslope hydrology. When referring to the hilly area, we have positioned the hillslope solely as a contributing source of runoff into the valley, drawing on previous study findings and our own field observations. The core framework of this study can be summarized as follows: surface runoff from the upland hillslope converges into the gully, where it is intercepted by check dams, forming pond storage that subsequently recharges groundwater.

Following your comment, we have redrawn Fig. 10 (in the original manuscript, and now Fig. 11 in the revised manuscript) to clearly define the spatial scope of this study as the gully area, with specific annotations for clarity. Accordingly, we have systematically reviewed and revised the Discussion section to ensure that all analyses, inferences, and conclusions are tightly focused on the hydrological processes within the gully area. The revisions are as follows:

#### **“5.4. Revised conceptual model**

To convey our evolving understanding of the spatial structure and dynamics in the Gully Region, we developed a conceptual model that reframes engineered gully systems not simply as erosion features but as hydrologically active conduits for groundwater recharge (Fig. 11). This framework traces precipitation's transformation into subsurface water, from runoff capture and surface ponding in dammed gully reaches, through infiltration in the unsaturated zone, to recharge in both shallow porous aquifer and deeper bedrock fissure systems.

This conceptual reframing is grounded in the stark hydrological contrasts between hilly uplands and gully systems and directly addresses a critical knowledge gap in understanding the hydrological functioning of managed gully environments. In the hilly uplands, previous studies have shown that thick loess deposits, often exceeding 90 m (including low-permeability aquifers), combined with steep slopes ( $>15^\circ$ ) severely restrict vertical infiltration (Zhu et al., 2018; Huang et al., 2019; Huang et al., 2024). Compounded by short-duration, high-intensity rainfall events that provide insufficient moisture for deep profile wetting, this results in the rapid conversion of rainfall into surface runoff (Li et al., 2021). This study further clarifies that the runoff is systematically funneled downslope into gully systems as a consequence of ecological engineering interventions, such as check dams and retention ponds that intercept and concentrate overland flow. Most

infiltration occurs after surface water accumulates in engineered gullies, particularly within perched water bodies like ponds, which subsequently serve as localized recharge foci, a conclusion supported by the isotopic and hydrochemical evidence presented in this study.

Crucially, gully systems possess distinct hydrogeological characteristics: the loess mantle is much thinner (typically < 25 m), and the soils are dominated by silt loam textures with moderate specific yield (0.02–0.05) and high field capacity (21–28%). These properties promote transient water storage and enable temporally delayed and depth-partitioned infiltration. Based on our integrated analyses of stable isotopes, chloride concentrations, and inverse transit time proxies, we find that engineered gullies function not as passive erosional features but as active, managed recharge conduits. This conceptualization captures a critical spatial transition, from runoff generation in the hilly uplands to focused recharge in gully zones, emphasizing the pivotal role of gully systems in regulating groundwater recharge across the Loess Plateau landscape.

Combined hydrological monitoring and multi-indicator analysis further reveal that following the rainy season, infiltration depths on hilly slopes are typically shallow (less than 1 m), while groundwater levels in gully areas exhibit pronounced rises exceeding 2 m (Fig. 11). Recharge estimates based on the water table fluctuations reach up to approximately 240 mm at the monitored gully reach, far surpassing values observed in deep unsaturated zones of tablelands and hills (Huang et al., 2011; Li et al., 2017; Lu, 2020; Wang et al., 2024). The results of this study reinforce the role of engineered gully reaches as focal points for groundwater recharge and further quantify site-scale pore-water recharge equivalent to ~43% of mean annual precipitation, a finding that highlights the efficiency of focused infiltration under managed conditions.

Liu et al. (2011) found that groundwater near valleys in the hilly loess area is replenished by precipitation, runoff, and surface water. Moreover, fissure water exhibits more depleted isotopic signatures and higher chloride concentrations, indicating deeper percolation of pore water or mixing with older recharge sources (Fig. 11). These patterns, supported by IITPs and statistical (SEM-based) connectivity indicators, reveal a hierarchical recharge sequence: event-driven infiltration enters a porous shallow aquifer, some of which slowly percolates into deeper fissure zones. This hierarchical mechanism is facilitated by the combination of thin loess mantles, engineered interventions (e.g., check dams and ponds), and delayed hydrological responses.

By integrating multiple lines of evidence, this conceptual model redefines engineered gullies

as selective recharge corridors whose hydrological function emerges from the interaction between geomorphic structure and human intervention. It challenges the traditional view of gullies as purely erosional landforms and emphasizes their dual hydrological function: acting both as runoff conveyance channels and as transient reservoirs that store and redistribute water across space and time. This recharge capacity is jointly governed by topographic convergence, reduced loess thickness, and the presence of engineered structures such as check dams and retention ponds that increase residence time.

Crucially, the model offers insight into the multifunctionality of ecological engineering, particularly check dams and ponds, in enhancing groundwater recharge, and supporting ecosystem restoration across the Loess Plateau. This study proposes a cascade-type recharge framework for engineered gully systems, highlighting the role of engineered gullies as convergence pathways that locally focus infiltration and groundwater recharge. Rather than invoking preferential flow within the soil matrix, this framework emphasizes topographic convergence, stratigraphic thinning, and engineered ponding as the dominant mechanisms that promote spatially concentrated recharge within gully zones. While this process is demonstrated using site-specific tracer and water-table observations, its broader relevance at the catchment scale remains conceptual and warrants further investigation. Furthermore, water movement within the silted loess layer of the gully system remains dominated by a piston flow pattern (Yu et al., 2025). By identifying the pivotal role of gully systems in stormwater detention, delayed infiltration, and depth-partitioned recharge, this study establishes a mechanistically grounded conceptual basis improving water resource allocation, infrastructure planning, and groundwater sustainability in arid and semi-arid regions.

However, with the reconstruction of gully systems and ecological restoration, attention must also be given to the potential risks of pollutant migration (Yu et al., 2020). The hydrological functions of gullies may enhance the movement of pollutants into groundwater, especially in areas with intensive human activities, where pollutants can enter engineered gullies through surface runoff and subsequently infiltrate the groundwater system. During ecological restoration, excessive human intervention or soil improvement measures may lead to the accumulation and dispersion of pollutants, which may compromise groundwater security (Liu et al., 2017). Therefore, the protection and rational reconstruction of gully systems should not only focus on their hydrological functions but also consider potential environmental risks, particularly the pathways of pollutant migration.

These findings therefore underscore the need to evaluate gully-based restoration strategies within an integrated water-quality and groundwater-protection framework.

The study confirms that hydrologically arrested gully systems can function as critical “recharge windows” for groundwater in arid areas. This underscores the importance of strategically identifying and managing gully networks in watershed management, while avoiding excessive filling or hardening to preserve their hydrological functions. In ecological restoration projects, directing surface runoff toward engineered gullies under controlled conditions can efficiently convert limited precipitation into groundwater storage, thereby enhancing regional water retention capacity. Beyond advancing theoretical understanding of regional hydrological processes, this conceptual model provides a process-based foundation for developing spatially targeted models of groundwater recharge in managed dryland landscapes.

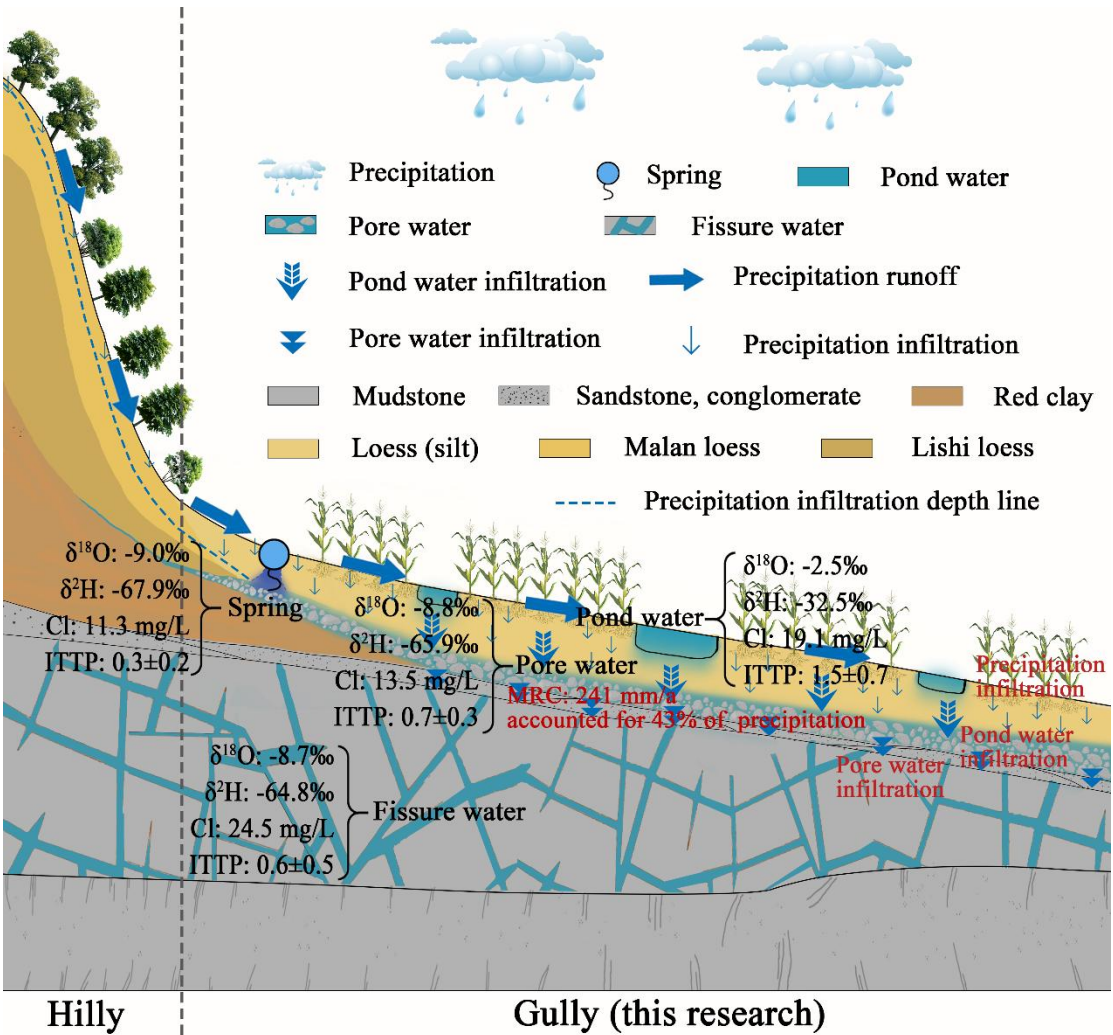

Fig. 11. Hydraulic connections between different water bodies in the hilly-gully region of the Loess Plateau. The study area consists of hilly and gully regions. In the hilly area, the stratigraphic sequence

from top to bottom is Malan loess, Lishi loess, red clay, sandstone, and mudstone. Rainfall infiltration within the Malan loess is less than 1 m, and the area is mainly covered by vegetation. In the gully area, the stratigraphy from top to bottom includes loess (silt), sandstone and conglomerate, and mudstone. Pore water is found within the sandstone and conglomerate, while fissure water occurs in bedrock fractures (mudstone). Numerous check dams or ponds are distributed throughout the gully area. The vertical separation between the pore water and pond water ranges from 3 to 5 m. Corn is the main crop cultivated in this region. Most springs in the study area are located at the junction of the hilly and gully regions and are discharged from pore water.”

**Specific comments:**

1. Fig. 1: Please label the horizontal and vertical scale of the hillslope profile. Without scale information, the geomorphic interpretation is unclear. And consider to switch the order of Fig. 1 and 2.

**Response:** Following your comment, we have added clear scale information to the hillslope profile. Specifically, both horizontal and vertical scale bars have been included to ensure a clear and accurate interpretation of the geomorphological features. The revised Fig. 2 (in the revised manuscript) is as follows:



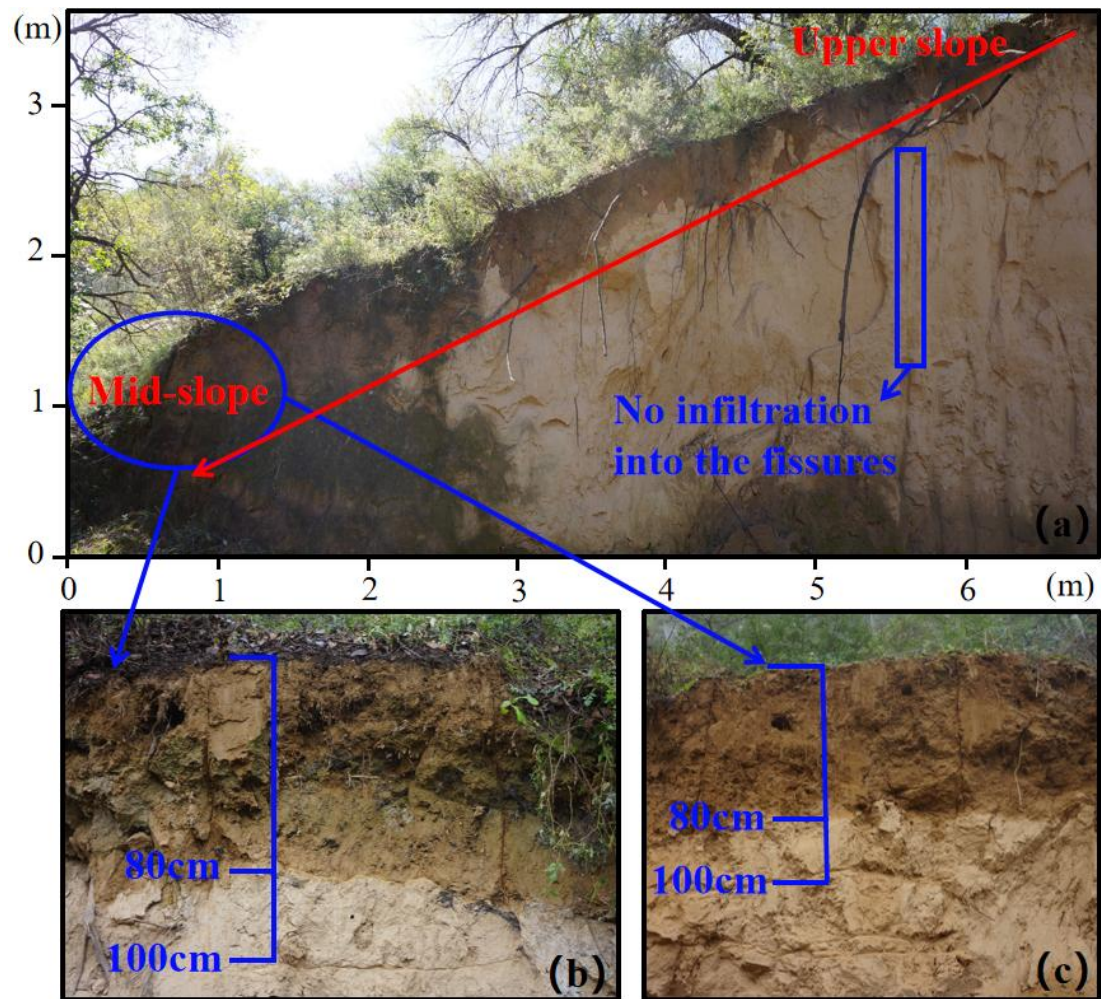

Fig. 2. The topographic profile of the Nianzhuang Catchment in the hilly region of the Loess Plateau. Full profile from the top to mid-slope (a); two repeated mid-slope profiles (b, c). The photo was taken after a 41 mm rainfall event over four days. Subsequent measurements showed that infiltration depths reached only 20–30 cm at the top of the slope, compared to approximately 80 cm at the mid-slope positions.

In response to General comment #1, we have relocated Fig. 1 to the “2. Sampling Sites” section and swapped the order of Fig. 1 and 2. This adjustment ensures that the figures are arranged logically to align with the structure of the section content.

2. Lines 272–273: The relationship between groundwater level and water pressure is introduced without sufficient justification. Why were these parameters selected over others? Please clarify the physical reasoning.

**Response:** According to the principles of hydrostatics, the hydrostatic pressure  $P$  at the sensor is

related to the height  $h$  of the overlying water column by  $P=\rho gh$ , where  $\rho$  is the water density and  $g$  is the gravitational acceleration. In an unconfined aquifer, the pressure measured by the sensor corresponds to the hydrostatic pressure exerted by the overlying water column. This allows for the calculation of the water column height  $h$ , and, combined with the sensor's elevation, the depth to the groundwater table can be determined. This method, based on the classical hydrostatic equilibrium principle, is a standard hydrological monitoring technique with a solid physical foundation and reliable measurement accuracy. Relevant content has been added to the manuscript, as detailed below:

“Precipitation was collected from October 24, 2023, to October 24, 2024, using a weather station situated in an open field within the catchment. Continuous groundwater level data were recorded from September 24, 2023, to December 20, 2024. **Groundwater pressure and temperature were monitored using Onset HOBO U20-001-03 sensors (20 m range), with a pressure accuracy of  $\pm 0.3\%$  FS ( $\pm 2.55$  kPa) and a resolution of  $< 0.085$  kPa, and a temperature accuracy of  $\pm 0.44$  °C with a resolution of  $0.1$  °C. The sensor was calibrated to atmospheric pressure before installation to ensure accurate measurement of absolute static water pressure, and water table levels were calculated based on the measured pressure data.** The conversion relationship between water pressure and groundwater level is given by  $Y = 0.86 \times X - 22.1$  where  $Y$  represents the groundwater level and  $X$  represents the water pressure. **The conversion between water pressure and groundwater level is based on the principle of hydrostatics. The hydrostatic pressure  $P$  at the sensor is related to the height of the overlying water column  $h$  by  $P=\rho gh$ , where  $\rho$  is the water density and  $g$  is the gravitational acceleration. In unconfined aquifer, the pressure measured by the sensor corresponds directly to the static pressure exerted by the overlying water column. From this, the water column height  $h$  can be calculated, and combined with the sensor's installation elevation, the depth to the groundwater table can be determined.** Notably, the monitoring well is located in the pore water layer of the gully region. The well is hand-dug (1.1 m wide, 10 m deep) and is unaffected by human activities.”

3. Lines 428–430 / Fig. 4c: Fig. 4c does not show a consistently decreasing trend of specific yield with depth. The statement that “Specific yield (Sy) peaks at  $-20$  cm (4.5%) but decreases with depth” is not convincingly supported by the figure. The interpretation that deeper layers “store water with

minimal drainage” therefore appears overstated and should be revised or better supported.

**Response:** Following your comment, we have revised the figure captions. The specific revisions are as follows:

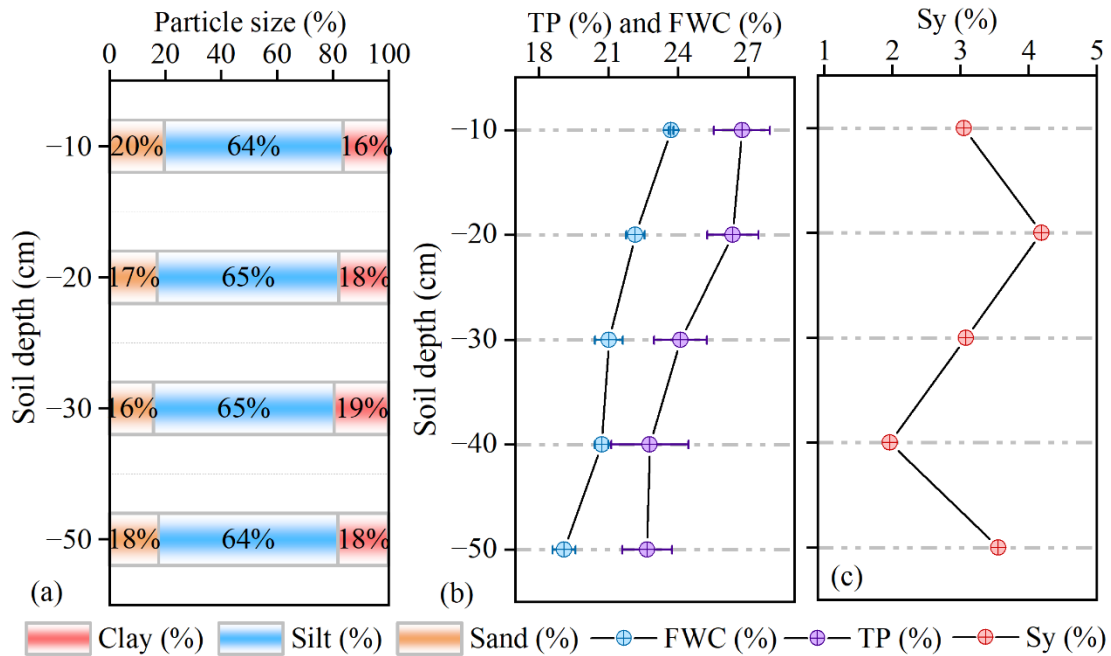

**Fig. 4. Vertical variation in soil texture and water retention characteristics in the gully region of the Loess Plateau. (a) Soil particle size distribution by depth, showing relatively uniform composition across layers (10–50 cm), dominated by silt (64–65%), with moderate clay (16–20%) and low sand (16–20%) content. This fine-textured profile supports high moisture retention and slows infiltration, promoting delayed recharge. (b) Depth profiles of total porosity (TP) and field water capacity (FWC) reveal decreases with depth to 40 cm, with FWC reaching ~27%, suggesting greater water-holding capacity in subsoil layers and enhanced buffering of infiltrated water. (c) Vertical variations in the Specific Yield (Sy) across different soil layers. Collectively, these physical properties reflect a vertically stratified soil system where near-surface layers regulate infiltration pulses, and deeper layers act as long-term storage, shaping the timing and magnitude of subsurface recharge.**

4. Fig. 5: The current representation of rainy versus dry seasons is unclear. The figure does not effectively illustrate isotopic differences between seasons, making the associated text difficult to support. Presenting seasonal mean values (or distributions) for each water type would likely convey the message more clearly.

**Response:** We agree with your comment that Fig. 5 provides relatively limited information on

isotopic data for the wet and dry seasons. To more systematically and comprehensively present the seasonal characteristics of isotopic values across various water bodies, we have supplemented the data in Fig. 6 and Table A2 in the original manuscript. Specifically, the box plots in Fig. 6 visually display the distribution range, median, and variability of  $\delta^{18}\text{O}$  and  $\delta^2\text{H}$  for each water source during both wet and dry seasons, facilitating comparison of overall seasonal differences and variation patterns. Table A2 provides statistical metrics, such as mean values and standard deviations, for each water type's isotopes during both seasons, enabling a quantitative comparison. The specific details are as follows:

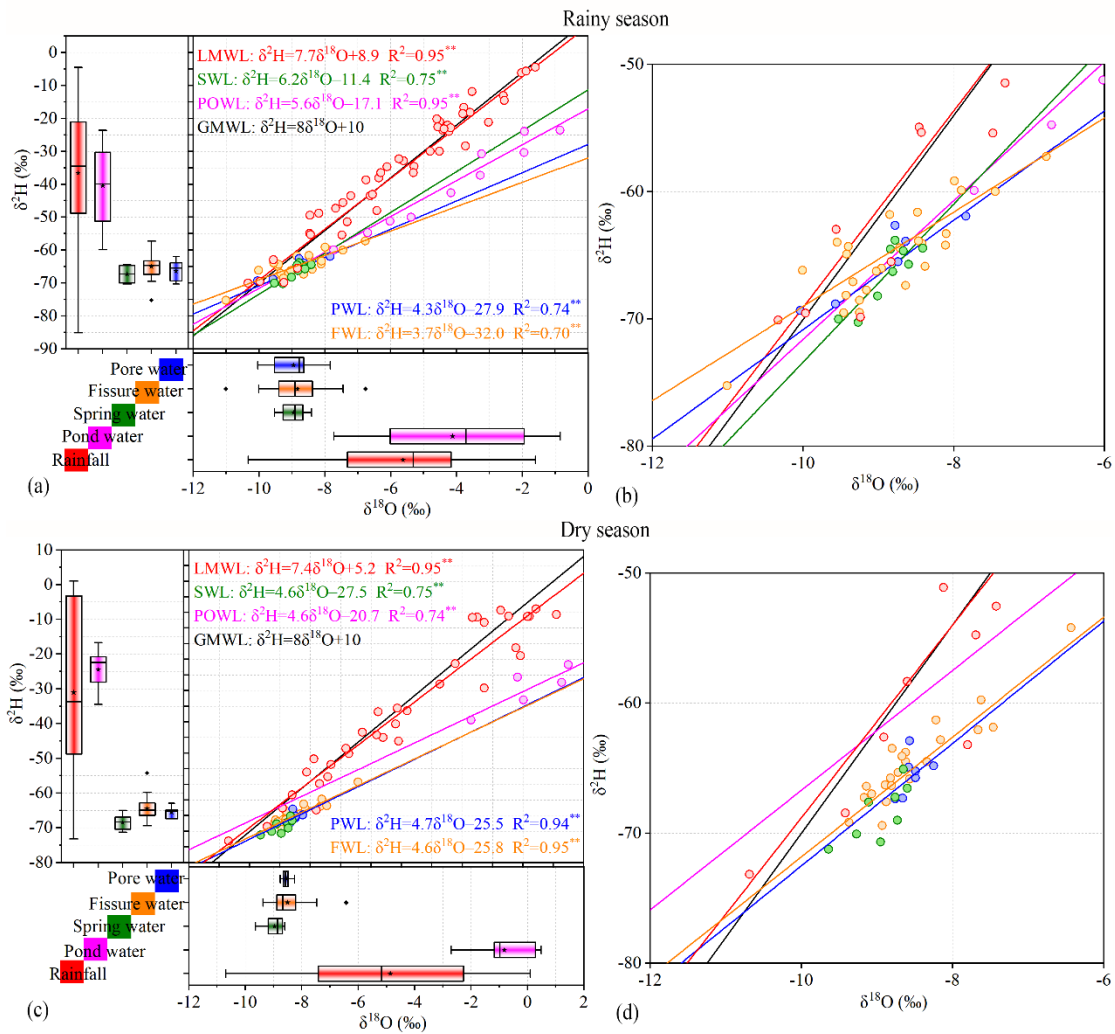

Fig. 6. Dual stable isotopic compositions of rainfall, pond water, spring water, pore water, and fissure water during the rainy season and dry season in the gully region of the Loess Plateau. The black line represents the global meteoric water line (GMWL,  $\delta^2\text{H}=10 + 8\delta^{18}\text{O}$ ). GMWL is the global meteoric water line of Craig, LMWL is the local meteoric water line, SWL is the spring water line, POWL is the pond water line, FWL is the fissure water line, and PWL is the pore water line. Panels

(b) and (d) are magnified views of (a) and (c), respectively, highlighting the isotopic compositions of pore water, fissure water, and spring water (x-axis:  $-12$  to  $-6\text{‰}$ ; y-axis:  $-80$  to  $-50\text{‰}$ ).

Table A2. Isotopic composition ( $\delta^2\text{H}$  and  $\delta^{18}\text{O}$ ) of various water sources in the rainy and dry seasons

|               | Rainy season           |                       | Dry season             |                       |
|---------------|------------------------|-----------------------|------------------------|-----------------------|
|               | $\delta^2\text{H}$     | $\delta^{18}\text{O}$ | $\delta^2\text{H}$     | $\delta^{18}\text{O}$ |
| Rainfall      | $-36.6\pm20.4\text{‰}$ | $-5.6\pm2.3\text{‰}$  | $-31.0\pm23.2\text{‰}$ | $-4.9\pm3.0\text{‰}$  |
| Pond water    | $-40.5\pm13.1\text{‰}$ | $-4.1\pm2.3\text{‰}$  | $-24.5\pm6.9\text{‰}$  | $-0.8\pm1.3\text{‰}$  |
| Spring water  | $-67.3\pm2.6\text{‰}$  | $-9.0\pm0.4\text{‰}$  | $-68.4\pm2.2\text{‰}$  | $-9.0\pm0.4\text{‰}$  |
| Pore water    | $-66.3\pm3.1\text{‰}$  | $-9.0\pm0.6\text{‰}$  | $-65.4\pm3.8\text{‰}$  | $-8.5\pm0.6\text{‰}$  |
| Fissure water | $-65.0\pm3.8\text{‰}$  | $-8.8\pm0.9\text{‰}$  | $-64.5\pm5.5\text{‰}$  | $-8.5\pm0.9\text{‰}$  |

5. Fig. 8: The meaning of “direct effects” and “total effects” is not clearly explained. Please clarify these terms explicitly in the caption and main text.

**Response:** Following your comment, we have added explanations of “direct effects” and “total effects” in the figure caption and methods section of the manuscript.

“Structural Equation Modeling (SEM) has been widely applied in water science to evaluate complex relationships among hydrological, geological, and anthropogenic variables, particularly in studies of groundwater contamination and water quality degradation (Wu, 2010; Lupi et al., 2019; Xie et al., 2025). In this study, SEM is used explicitly as an exploratory, hypothesis-generating tool to assess potential hydrological connectivity among water sources based on dual-isotope ( $\delta^2\text{H}$ – $\delta^{18}\text{O}$ ) data from rainfall, pond water, spring water, pore water, and fissure water. SEM is not a mass-conserving or process-based flow model, nor is it used here to infer volumetric fluxes, recharge rates, or source apportionment. Instead, it serves as a statistical consistency check on hypothesized connectivity, identifying direct and indirect associations among water bodies that are evaluated in conjunction with tracer evidence and hydrometric observations.

Within the SEM framework, path relationships are primarily explained through two types of effects: The direct effect refers to the immediate impact of one variable on another through a single path, typically quantified as a standardized regression coefficient. Total effect represents the overall

impact of one variable on another through all possible paths (including both direct and indirect), calculated as the sum of the direct effect and all indirect effects. Comparing direct and total effects allows identification of intermediary linkages and dominant association structures within the hypothesized connectivity network.”

“Fig. 9. Structural equation modeling (SEM) and variance partitioning results illustrating hydraulic connectivity among water sources in the gully region of the Loess Plateau. Panels (a) and (b) show the standardized direct (a) and total effects (b) among rainfall, pond water, pore water, spring water, and fissure water, based on  $\delta^{18}\text{O}$  and  $\delta^2\text{H}$  data. **In SEM, the total effect includes both direct pathways (a; e.g., rainfall  $\rightarrow$  pore water) and indirect pathways mediated by other variables (b; e.g., rainfall  $\rightarrow$  pond water  $\rightarrow$  pore water).** Arrows indicate hypothesized water flow pathways, with line thickness proportional to effect size. Asterisks denote statistical significance (\* $P < 0.05$ , \*\* $P < 0.01$ , \*\*\* $P < 0.001$ ). The model fit is excellent ( $\chi^2 = 0.3$ ,  $df = 2$ , RMSEA = 0.009, CFI = 1.0, NFI = 0.994), supporting the robustness of these inferred connections. Panels (c) and (d) present variance partitioning results showing the relative contributions of source waters to pore water and fissure water during the rainy and dry seasons, respectively. In panel (c), rainfall (red) and pond water (pink) explain a large portion of pore water variability, with some shared explanatory power and modest residuals. In panel (d), fissure water reflects a more complex origin, with contributions from rainfall (red), pond water (pink), and pore water (blue), and greater overlap and residuals, especially during the dry season.”

6. Fig. 9: The lines representing the “RISE” and “MRC” methods are not clearly distinguishable in the figure.

**Response:** In the original manuscript, the “RISE” and “MRC” curves were plotted on the same axis to facilitate a direct comparison of their results. As you rightly observed, the close similarity between the two methods made the lines difficult to distinguish, which compromised the clarity and effectiveness of the information presented.

Based on your comment, we have redrawn and optimized Fig. 9 (in the original manuscript, and now Fig. 10 in the revised manuscript) and revised its caption accordingly. The specific revisions are as follows:



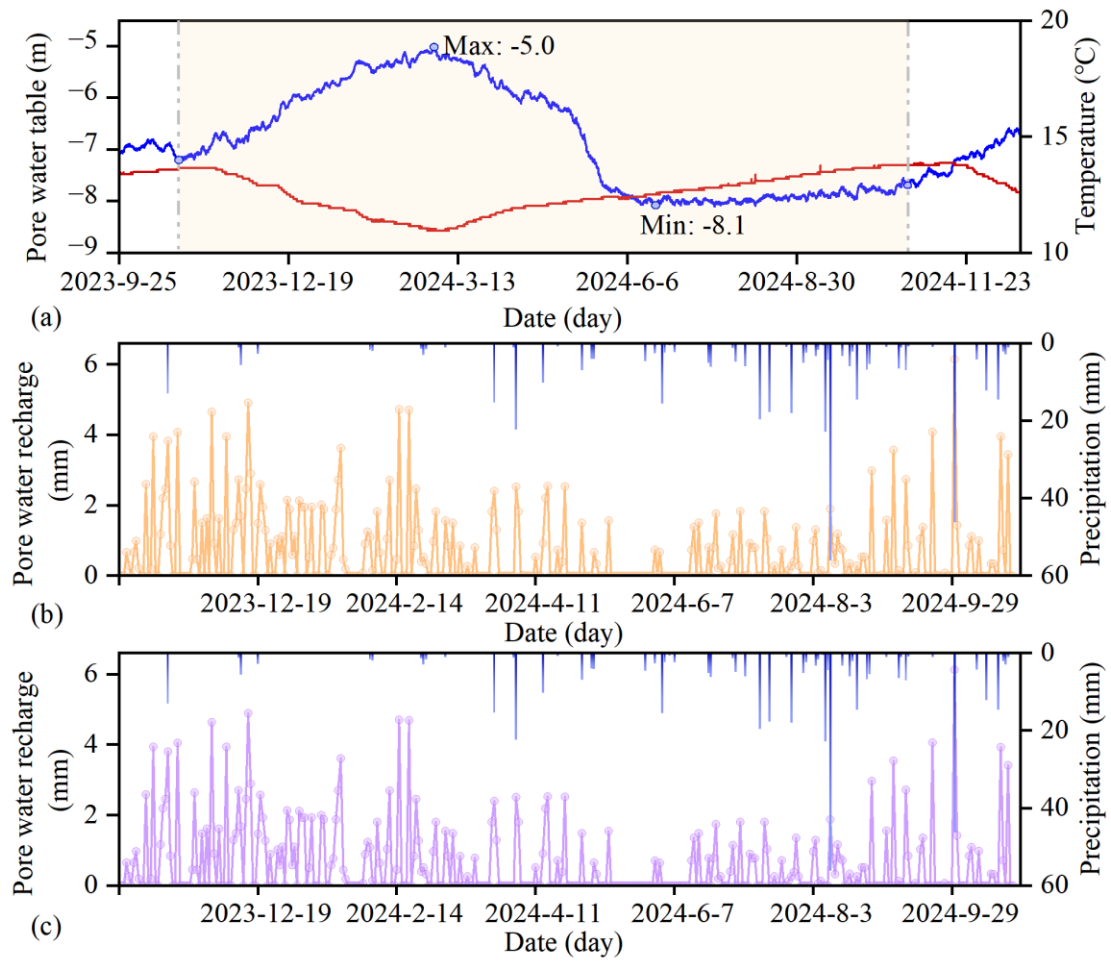

Fig. 10. Temporal dynamics of pore water table depth, temperature, precipitation, and recharge in the gully region of the Loess Plateau. (a) Daily time series of pore water table depth (blue line) and surface temperature (red line) from September 2023 to November 2024. The water table fluctuates seasonally, rising from  $\sim -8.1$  m in late summer to a maximum of  $\sim -5.0$  m in early spring (March 2024), indicating delayed infiltration and cool-season recharge. (b) Daily precipitation (blue bars) and modeled pore water recharge estimates using the MRC methods. (c) Daily precipitation (blue bars) and modeled pore water recharge estimates using the RISE methods. Most recharge events occur from October to April, even when rainfall is not especially high, while warm-season precipitation contributes little to recharge, likely due to increased evaporative losses and shallow soil retention. Together, these patterns suggest strong seasonal control on recharge processes, with effective infiltration primarily occurring during cooler, low-evaporation periods.
